# Supplementary material for: Pyrene-based aggregation-induced emission luminogens (AIEgen): structure correlated with particle size distribution and mechanochromism
Source: Royal Society of Chemistry journal article supplement (doi:10.1039/c9tc01665a), 2019-01-01
Supplement: c9tc01665a1.pdf [file c9tc01665a1.pdf]

# Pyrene-based Aggregation-induced Emission Luminogens (AIEgen): Structure Correlated with Particle Size Distribution and Mechanochromism

Xing Feng,<sup>\*ab‡</sup> Jun Zhang,<sup>b‡</sup> Zhen Hu,<sup>a</sup> Qingsong Wang,<sup>a</sup> Md. Monarul Islam,<sup>a</sup> Jen-Shyang Ni,<sup>c</sup> Mark R. J. Elsegood,<sup>d</sup> Jacky W. Y. Lam,<sup>b</sup> Erjun Zhou,<sup>\*e</sup> Ben Zhong Tang<sup>\*bc</sup>

---

<sup>a</sup>Guangdong Provincial Key Laboratory of Functional Soft Condensed Matter, School of Material and Energy, Guangdong University of Technology, Guangzhou 510006, P. R. China. \*E-mail: [hyxhn@sina.com](mailto:hyxhn@sina.com).

<sup>b</sup>Department of Chemistry and Hong Kong Branch of Chinese National Engineering Research Center for Tissue Restoration and Reconstruction, The Hong Kong University of Science & Technology, Clear Water Bay, Kowloon, Hong Kong, China. \*E-mail: [tangbenz@ust.hk](mailto:tangbenz@ust.hk).

<sup>c</sup>HKUST-Shenzhen Research Institute, No. 9 Yuexing 1st RD, South Area, Hi-tech Park, Shenzhen 518057, China

<sup>d</sup>Chemistry Department, Loughborough University, Loughborough LE11 3TU, UK.

<sup>e</sup>CAS Key Laboratory of Nanosystem and Hierarchical Fabrication, CAS Center for Excellence in Nanoscience, National Center for Nanoscience and Technology, Beijing 100190, China. \*E-mail: [zhouej@nanoctr.cn](mailto:zhouej@nanoctr.cn)

# 1. NMR spectrum

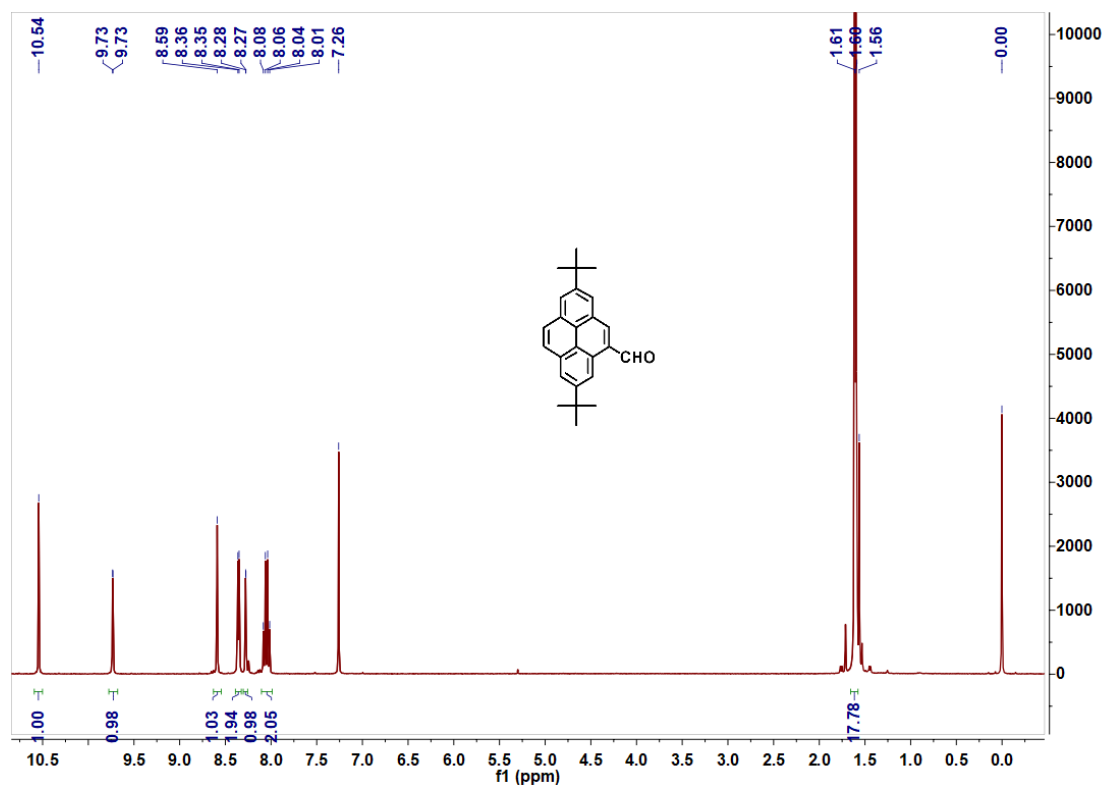

Figure S1. <sup>1</sup>H NMR spectrum of 2,7-di-tert-butylpyrene-4-carbaldehyde (400 MHz, CDCl<sub>3</sub>, 293 K).

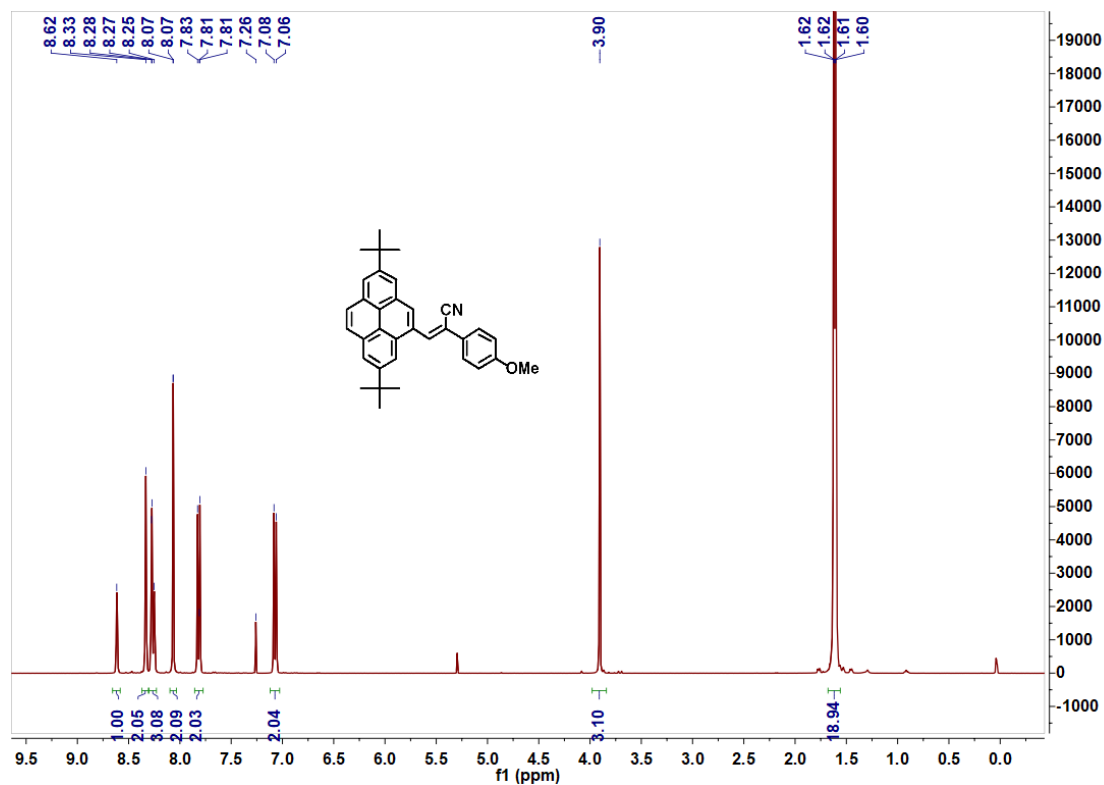

Figure S2. <sup>1</sup>H NMR spectrum of 2 (400 MHz, CDCl<sub>3</sub>, 293 K).

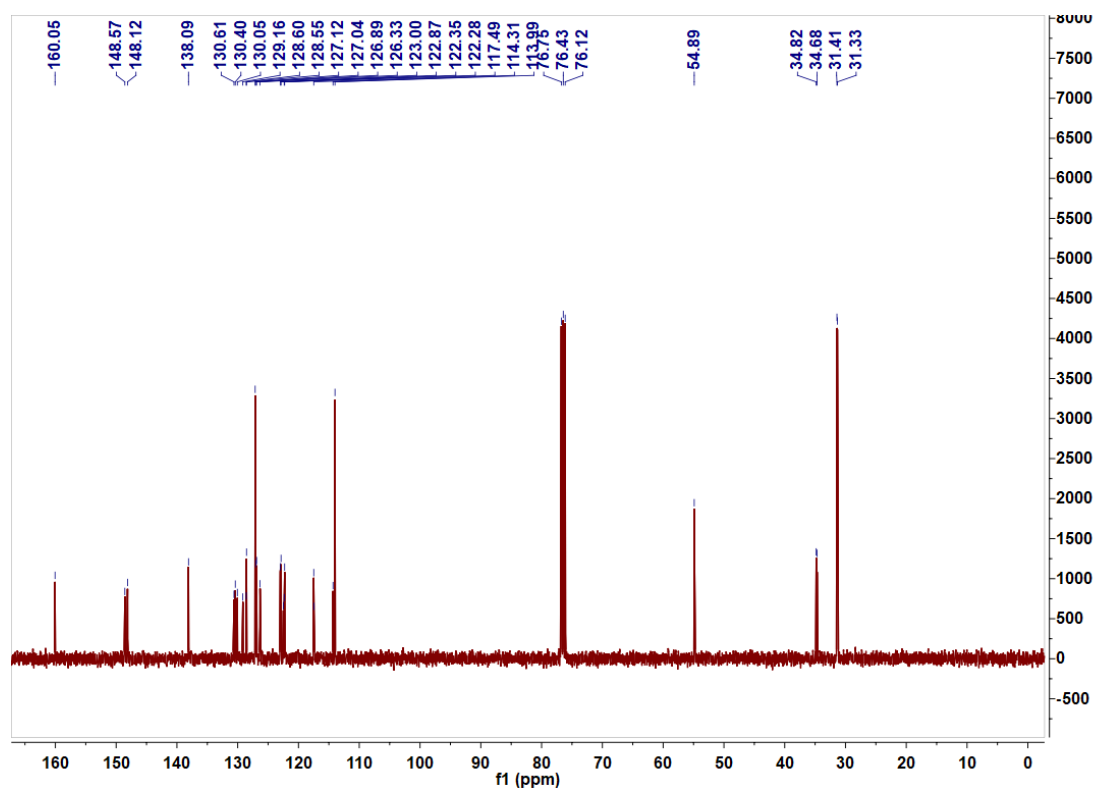

Figure S3.  $^{13}\text{C}$  NMR spectrum of **2** (100 MHz,  $\text{CDCl}_3$ , 293 K).

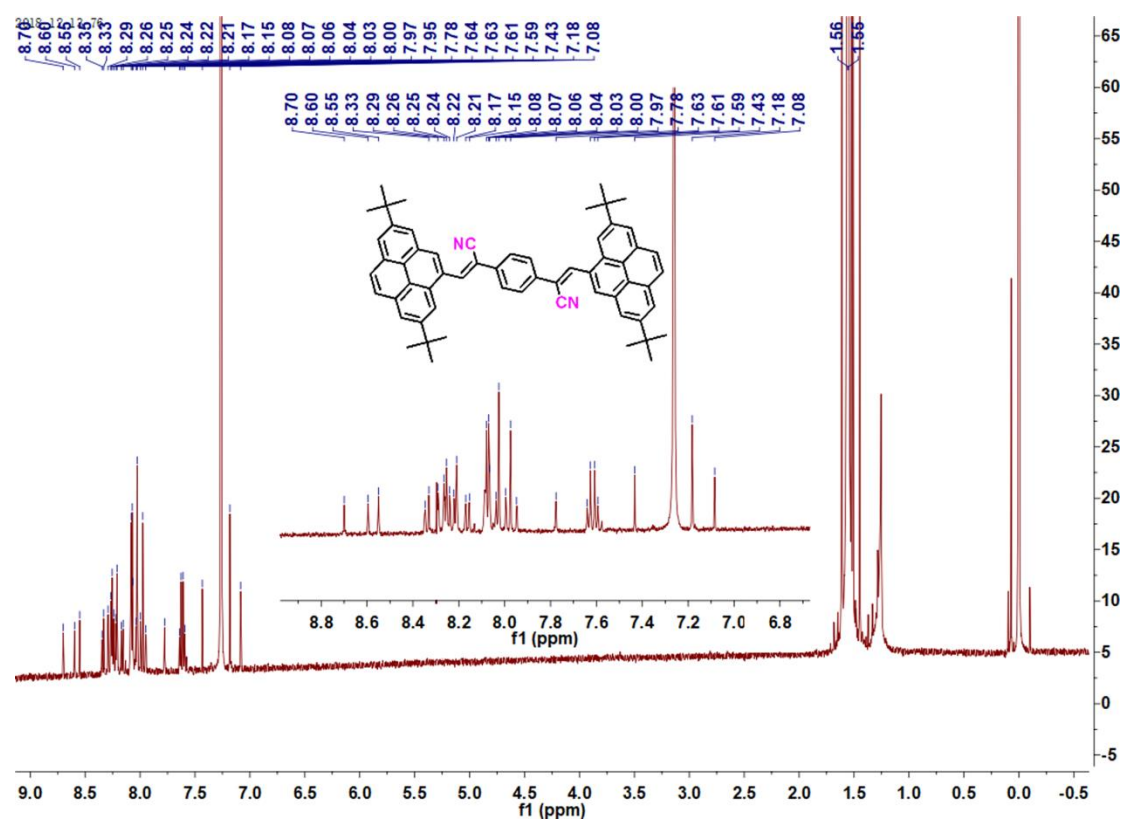

Figure S4.  $^1\text{H}$  NMR spectrum of **3** (600 MHz,  $\text{CDCl}_3$ , 293 K).

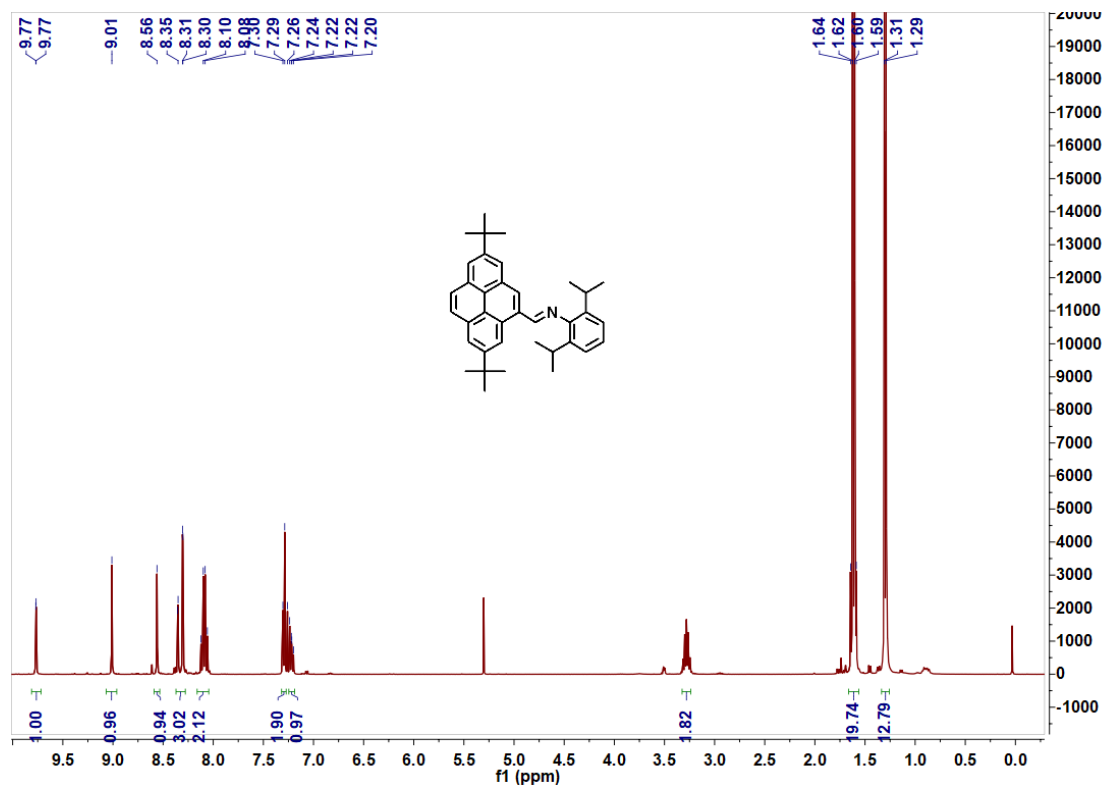

Figure S5.  $^1\text{H}$  NMR spectrum of **4** (400 MHz,  $\text{CDCl}_3$ , 293 K).

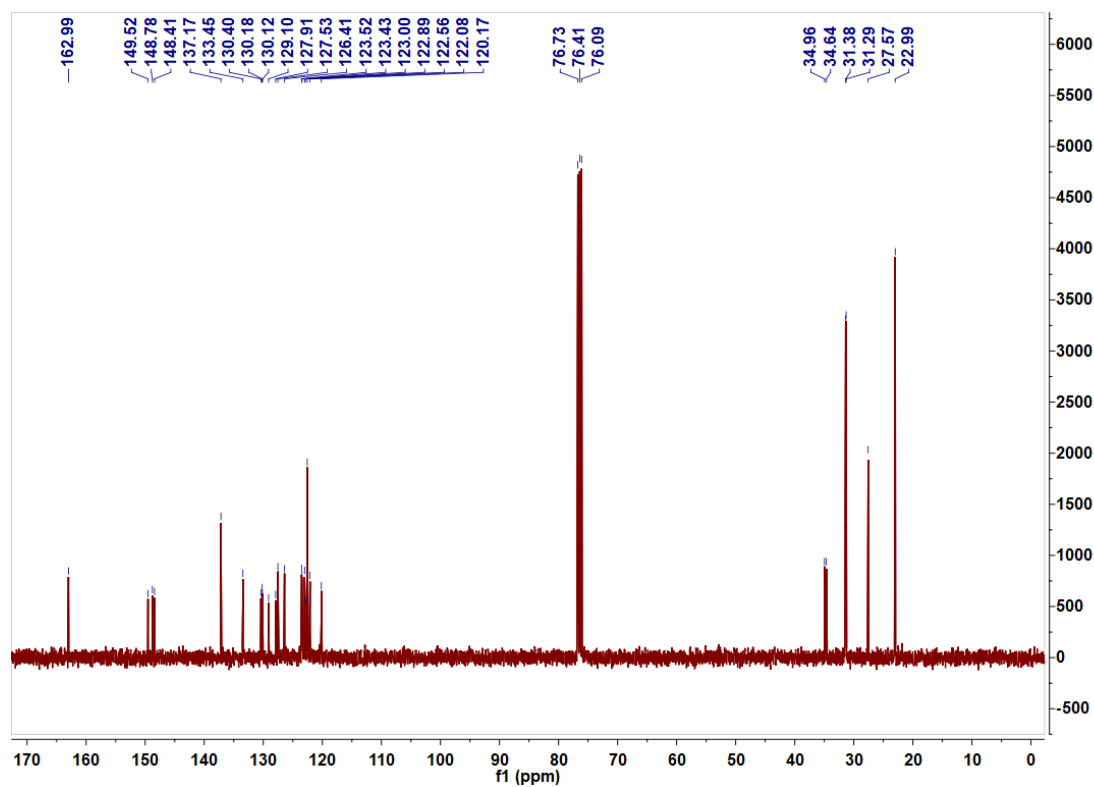

Figure S6.  $^{13}\text{C}$  NMR spectrum of **4** (125 MHz,  $\text{CDCl}_3$ , 293 K).

## 2. Mass spectrum

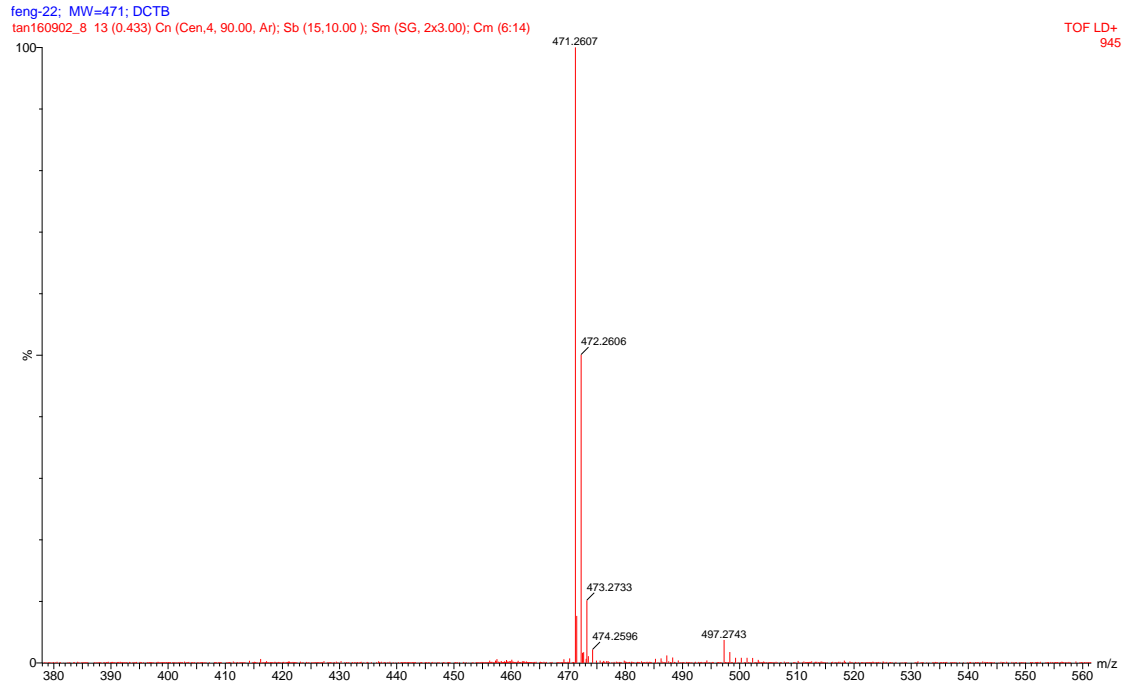

Figure S7. Mass spectrum of 2.

32 #5 RT: 0.04 AV: 1 SB: 1 0.02 NL: 4.22E6  
T: FTMS + p APCI corona Full ms [150.00]

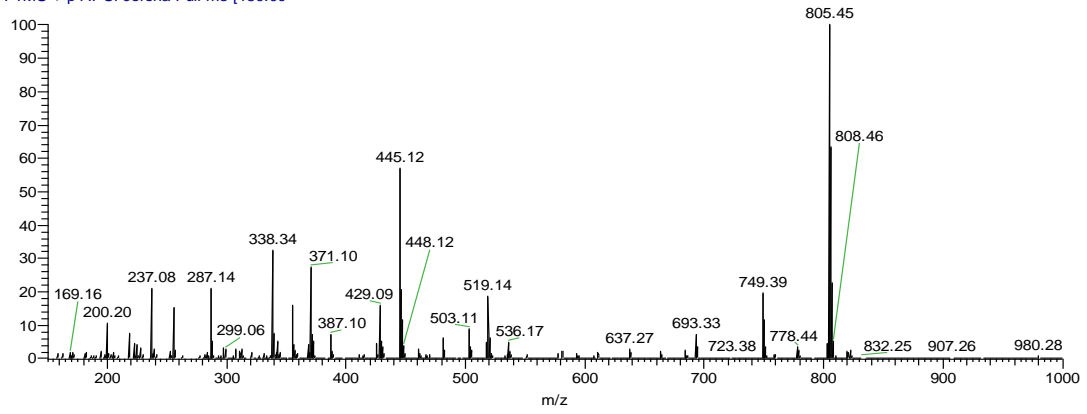

Figure S8. Mass spectrum of 3.

fx-25; MW=500; DCTB  
tan161007\_12 12 (0.399) Cn (Cen,4, 90.00, Ar); Sb (15,10.00); Sm (SG, 2x3.00); Cm (3:12)

TOF LD+  
332

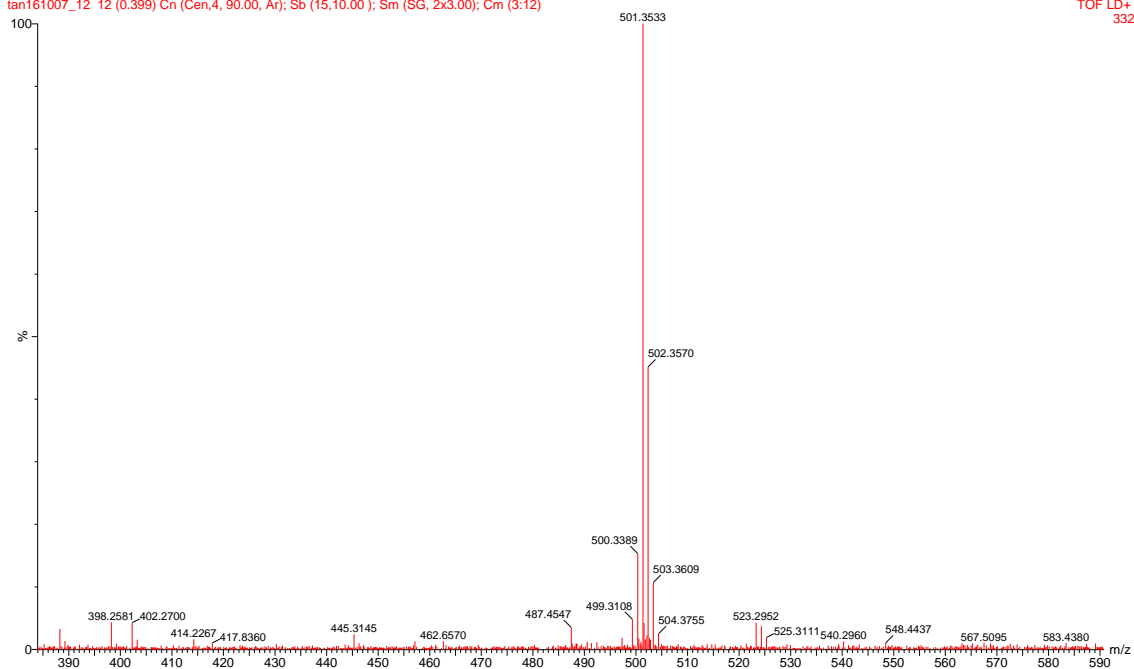

Figure S9. Mass spectrum of 4.

### 3. Thermal stability

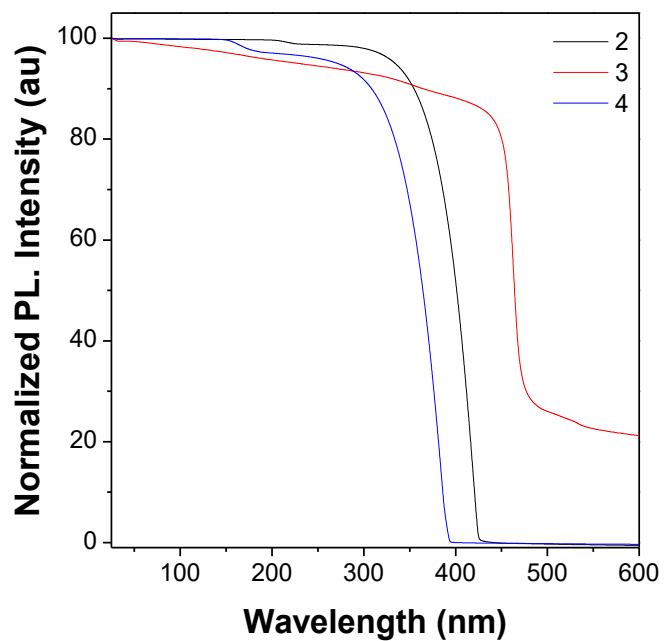

**Figure S10.** TGA thermograms of **2-4** under nitrogen at a heating rate of 10 °C/min.

#### 4. Photophysical properties

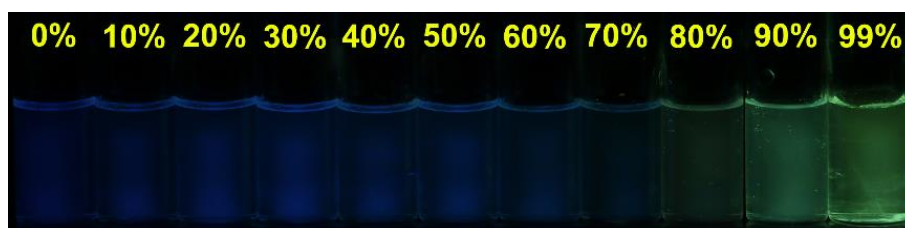

**Figure S11.** Fluorescent photographs of **2** in THF/ water mixtures from  $f_w = 0$  to 99% taken under UV illumination ( $\lambda_{ex} = 365\text{nm}$ ).

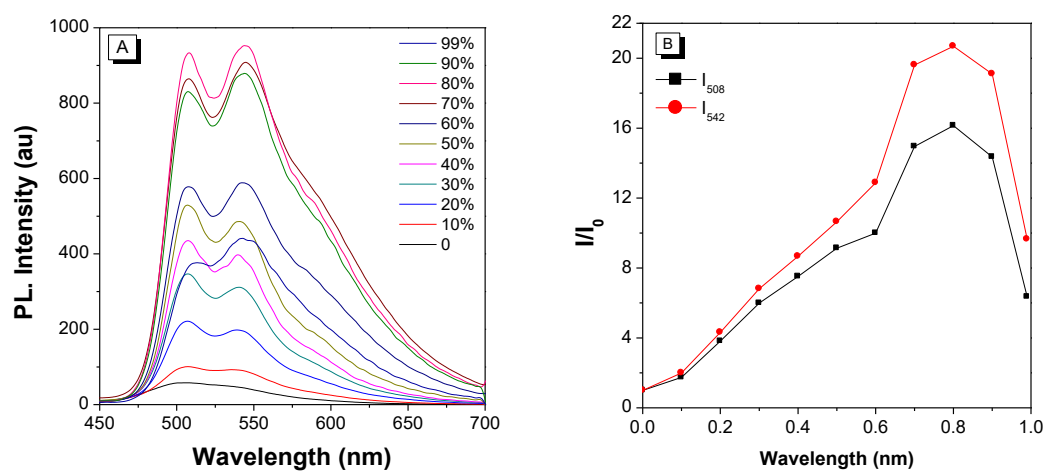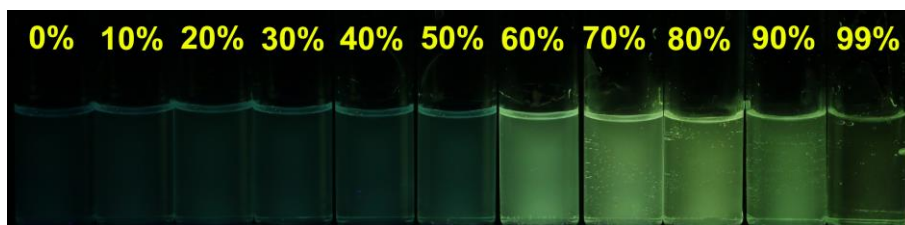

**Figure S12.** (A) PL spectra of **3** in THF/water mixture with different water fractions ( $f_w$ ). (B) Plot of  $I/I_0$  versus the composition of THF/water mixture of **3**, where  $I_0$  is the PL intensity in pure THF solution at 508 and 542 nm. Down) fluorescent photographs of **Py-TriPE** in THF/ water mixtures ( $f_w = 0$  and 99%) taken under UV illumination ( $\lambda_{ex} = 365\text{ nm}$ ).



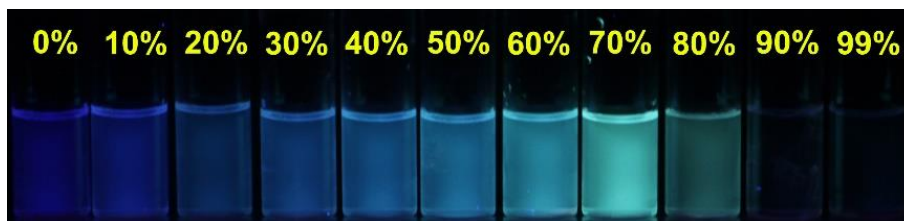

**Figure S13.** Fluorescent photographs of **4** in THF/ water mixtures from  $f_w = 0$ , to 99% taken under UV illumination ( $\lambda_{\text{ex}} = 365\text{nm}$ ).

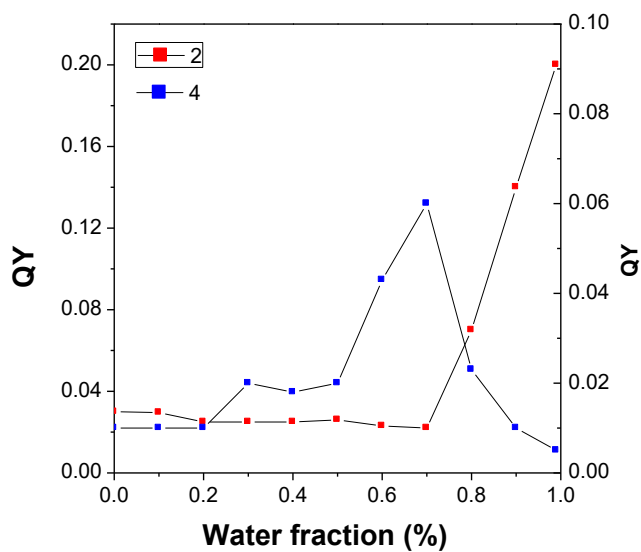

**Figure S14.** Fluorescent quantum yield of **2** and **4** in THF/ water mixtures from  $f_w = 0$ , to 99%.

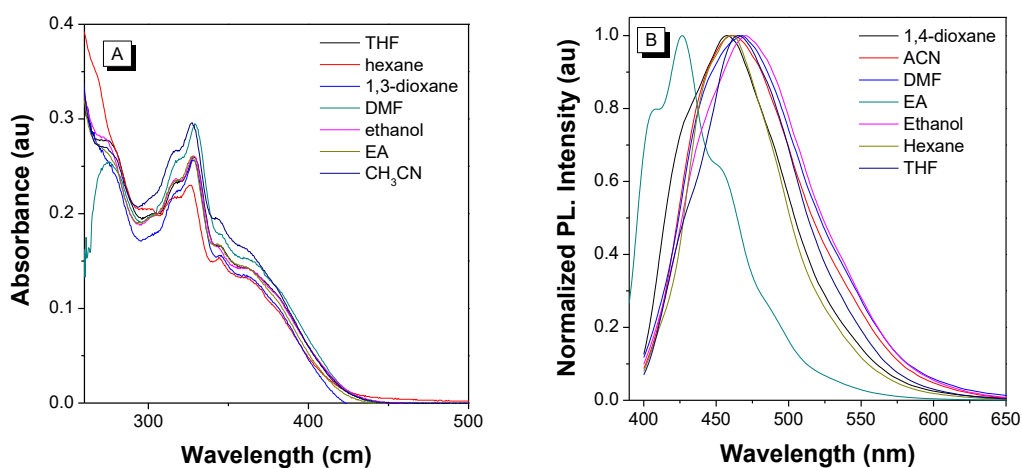

**Figure S15.** UV absorption and Fluorescence spectra of the compound **2** recorded in seven solvents at  $\sim 10^{-5}$  M and 25 °C.

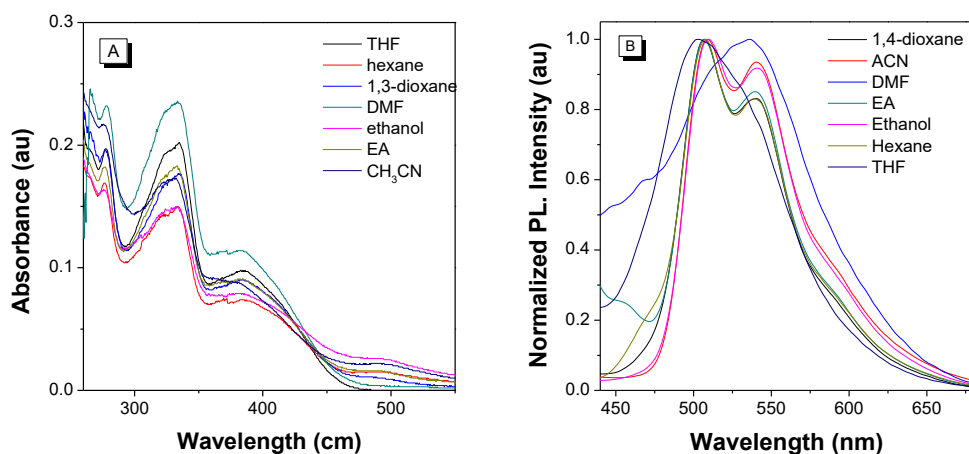

**Figure S16.** UV absorption and Fluorescence spectra of the compound **3** recorded in seven solvents at  $\sim 10^{-5}$  M and 25 °C.

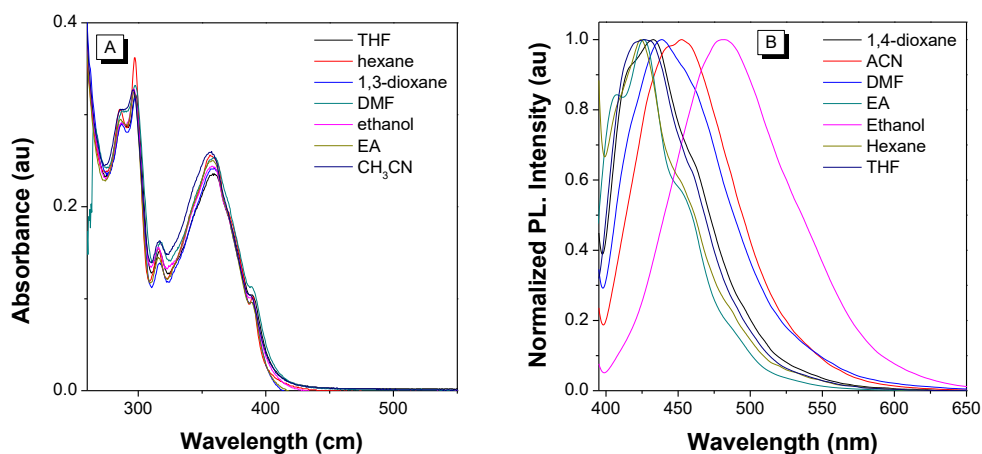

**Figure S17.** UV absorption and Fluorescence spectra of the compound **4** recorded in seven solvents at  $\sim 10^{-5}$  M and 25 °C.

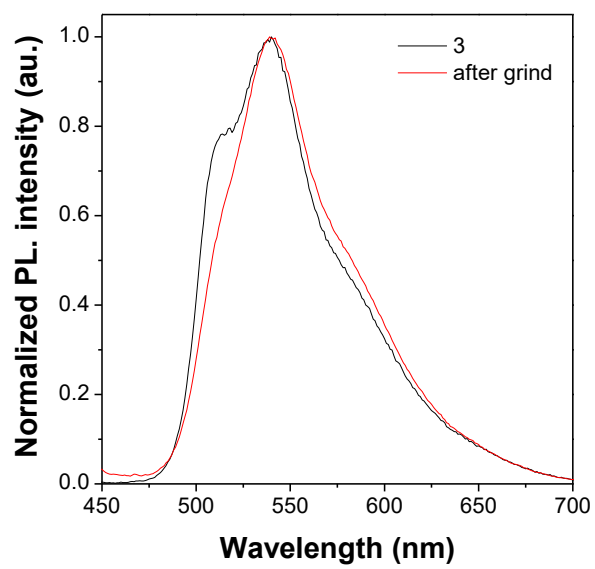

**Figure S18.** PL spectra of **3** in solid state.

## DLS analysis

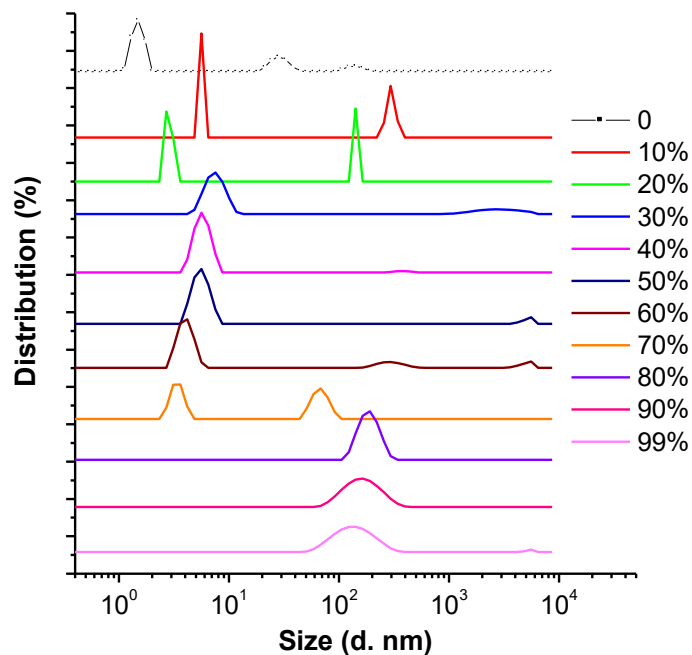

**Figure S19.** DLS study on nanoparticle size distribution of **2** in THF/water mixture with different water fractions ( $f_w$ ).

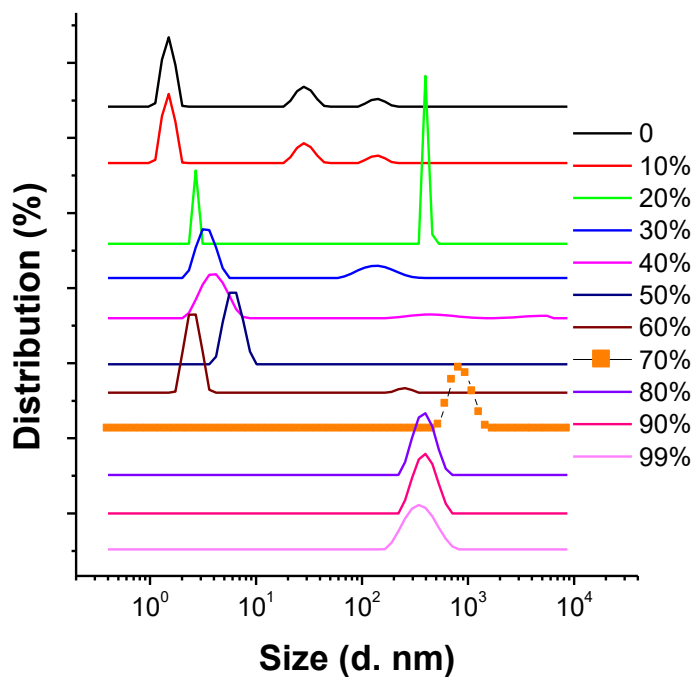

**Figure S20.** DLS study on nanoparticle size distribution of **4** in THF/water mixture with different water fractions ( $f_w$ ).

## Morphology analysis

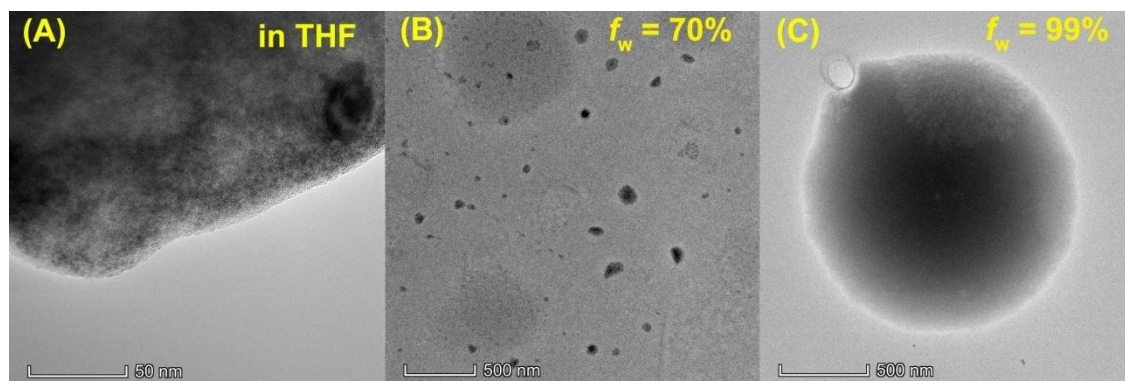

**Figure S21.** TEM image of **2** (A) in THF, (B) in 70 % water and (C) in water fraction  $f_w = 99\%$ .

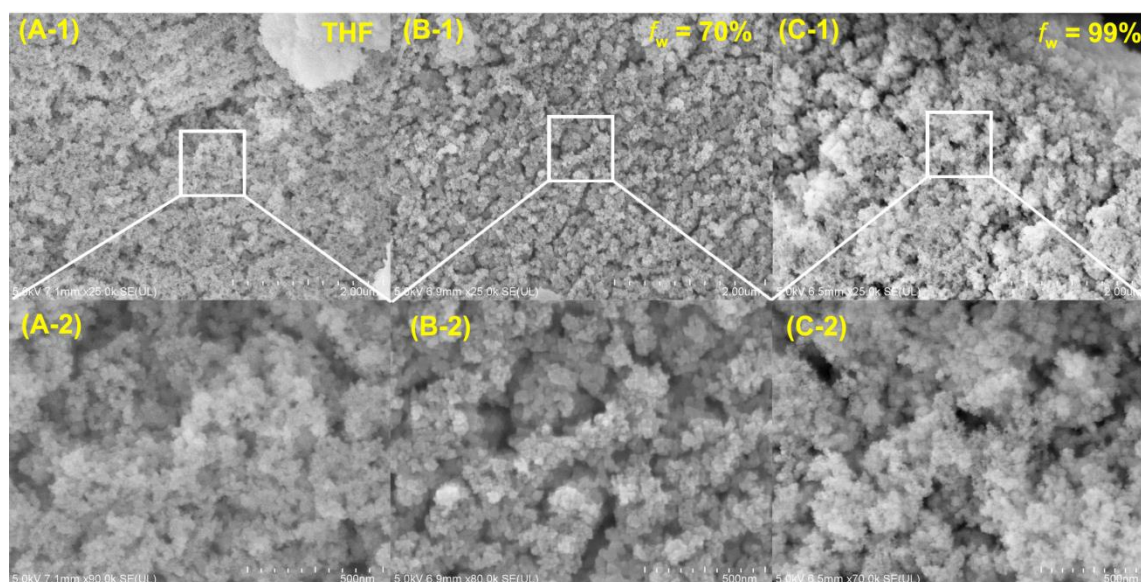

**Figure S22.** FE-SEM image of self-assembled morphology of **3** (A) in THF; (B) in water fraction  $f_w = 70\%$ ; (C) in water fraction  $f_w = 99\%$ , (A-2, B-2 and C-2) SEM image of the extending regions.



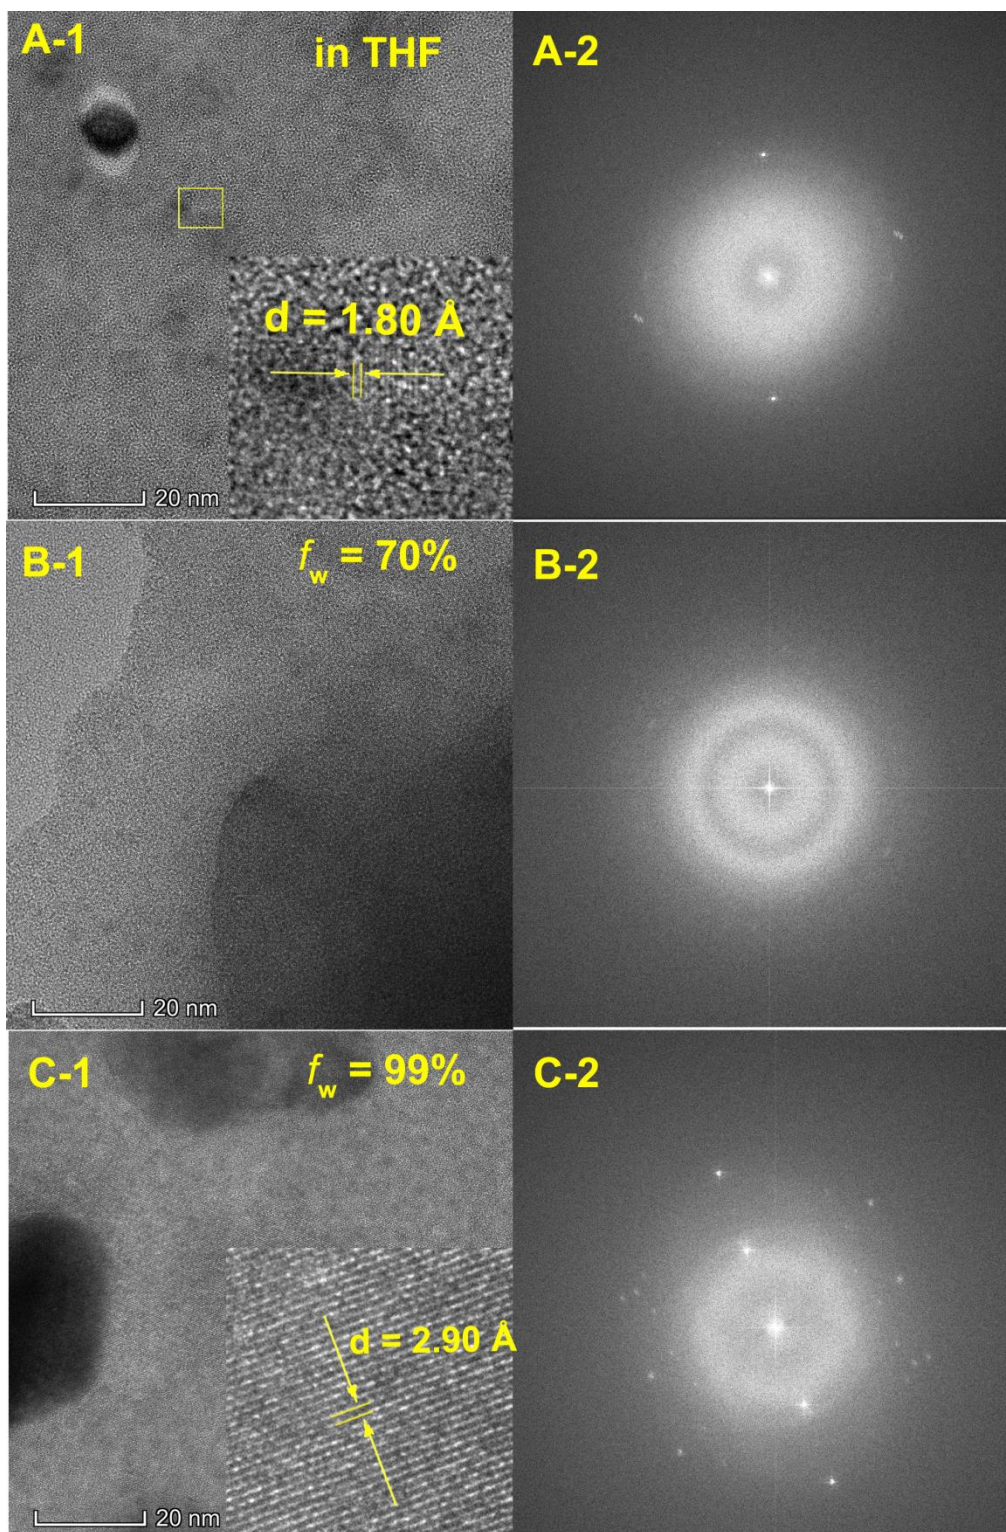

**Figure S23.** high-resolution TEM images of self-assembled morphology of **3** (A) in THF; (B) in water fraction  $f_w = 70\%$ ; (C) in water fraction  $f_w = 99\%$ , Insert: HR-TEM image taken from the yellow square and the corresponding (A-2, B-2 and C-2) selected-area electron diffraction (SAED) pattern.

### XRD analysis

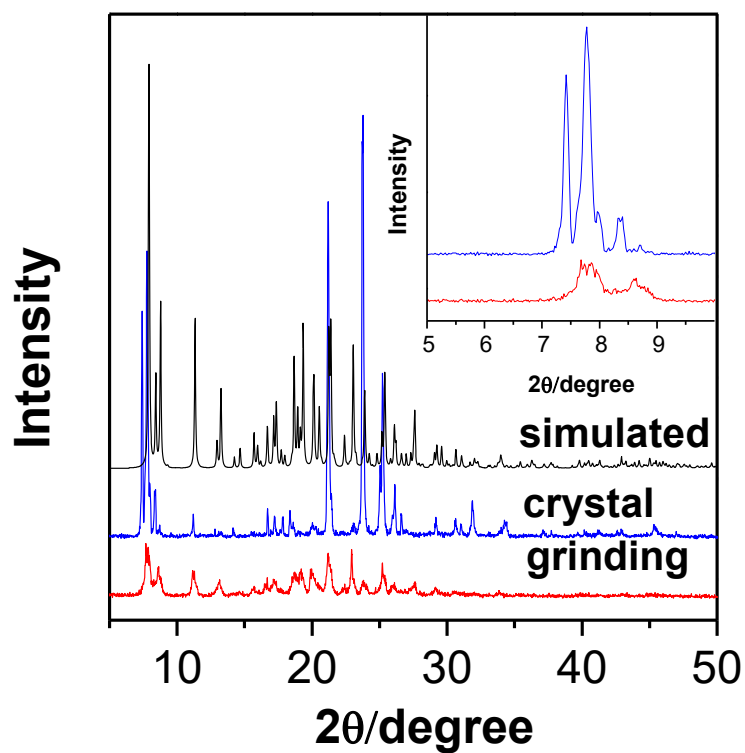

Figure 24. Wide angle XRD diffractograms of 2 in different state

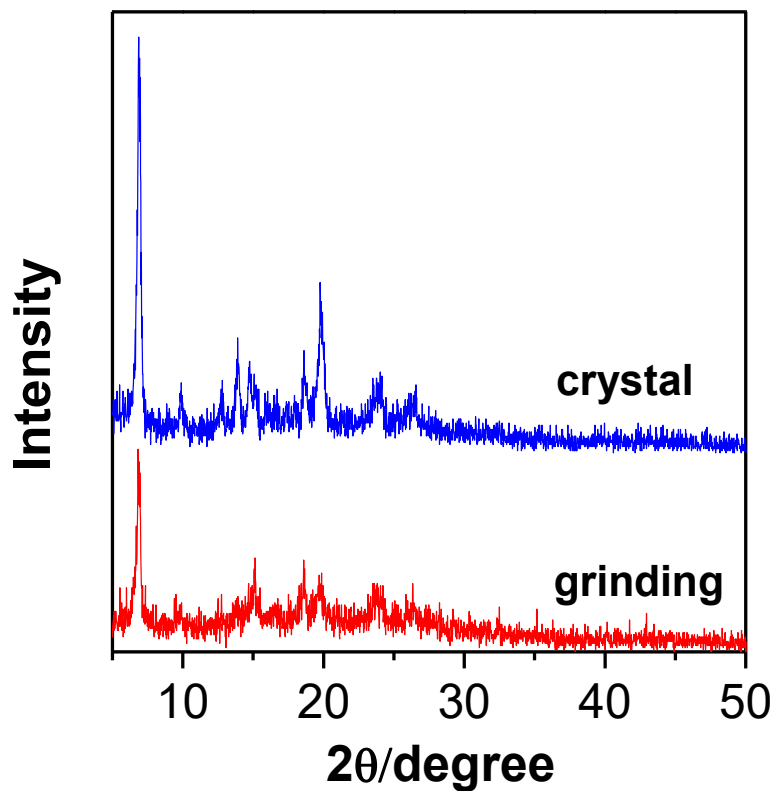

Figure 25. Wide angle XRD diffractograms of 3 in different state

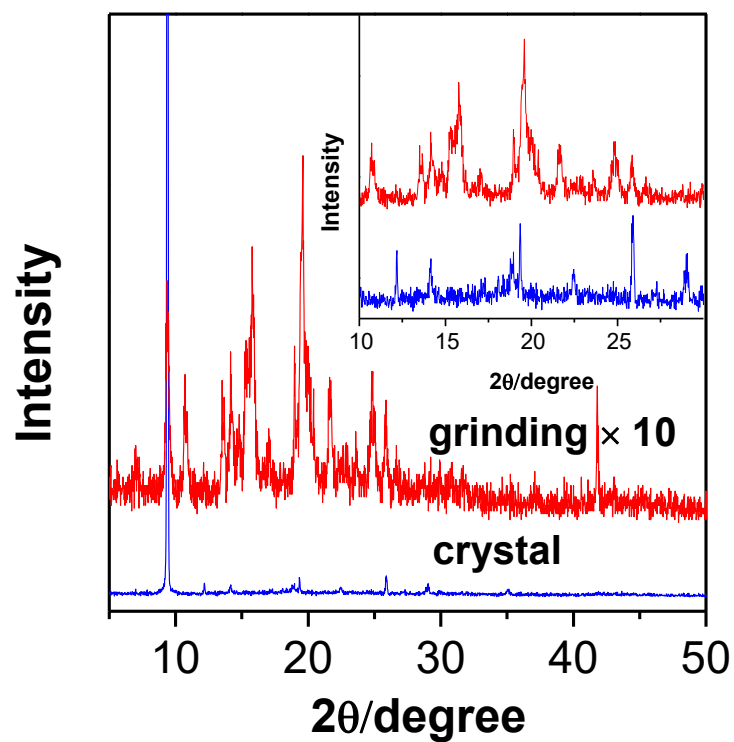

Figure 26. Wide angle XRD diffractograms of 4 in different state

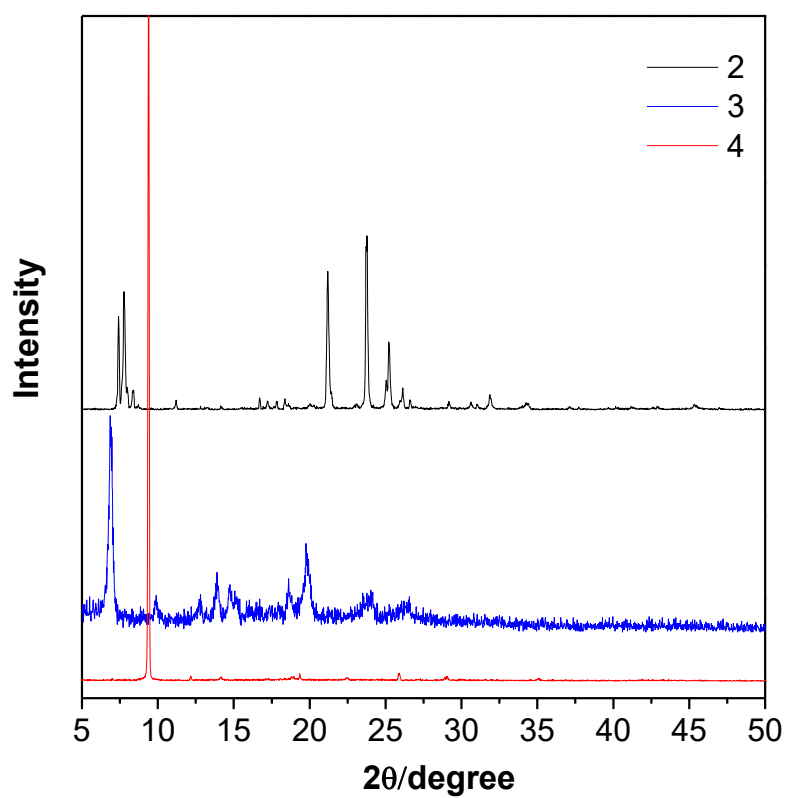

Figure 27. Wide angle XRD diffractograms of 2-4.



**Table S1** Summarized of XRD parameter **2**

| <b>simulated<sup>a</sup></b> |                    | <b>crystal</b> |                    | <b>Grind</b> |                    | <b>Heavy grind</b> |                    |
|------------------------------|--------------------|----------------|--------------------|--------------|--------------------|--------------------|--------------------|
| <b>2θ</b><br>(°)             | <b>FWHM</b><br>(°) | <b>2θ(°)</b>   | <b>FWHM</b><br>(°) | <b>2θ(°)</b> | <b>FWHM</b><br>(°) | <b>2θ(°)</b>       | <b>FWHM</b><br>(°) |
| 7.906                        | 0.173              | 7.773          | 0.152              | 7.805        | 0.419              | 7.806              | 0.371              |
| 8.772                        | 0.165              | 8.700          | 0.061              | 8.605        | 0.449              | 8.578              | 0.499              |
| 11.322                       | 0.179              | 11.183         | 0.072              | 11.235       | 0.335              | 11.221             | 0.340              |
| 12.947                       | 0.121              | 12.803         | 0.034              | 13.091       | 0.394              | 13.092             | 0.368              |
| 15.685                       | 0.124              | 15.701         | 0.034              | 15.667       | 0.303              | 15.707             | 0.454              |
| 17.132                       | 0.114              | 17.215         | 0.096              | 17.197       | 0.462              | 17.138             | 0.825              |
| 18.646                       | 0.256              | 18.578         | 0.187              | 18.702       | 0.444              | 18.608             | 0.449              |
| 20.097                       | 0.230              | 20.033         | 0.347              | 20.054       | 0.445              | 20.092             | 0.744              |
| 20.521                       | 0.181              | 21.184         | 0.150              | 21.219       | 0.330              | 21.203             | 0.390              |

<sup>a</sup> fitted based on crystal

**Table S2** Summarized of XRD parameter **2**

| d-spacings<br>(Å)<br>h k l | simulated <sup>a</sup> | crystal | Grind  | Heavy grind |
|----------------------------|------------------------|---------|--------|-------------|
| <b>0 2 0</b>               | 11.165                 | 11.157  | 11.177 | 11.113      |
| <b>1 0 0</b>               | 10.497                 | 10.512  | 10.544 | 10.516      |
| <b>0 1 1</b>               | 10.070                 | 10.129  | 10.069 | 10.107      |
| <b>1 1 0</b>               | 9.499                  | 9.509   | 9.536  | 9.506       |
| <b>0 2 1</b>               | 7.936                  | 7.962   | 7.939  | 7.940       |
| <b>1 -1 -1</b>             | 7.801                  | 7.847   | 7.802  | 7.820       |
| <b>1 2 0</b>               | 7.648                  | 7.651   | 7.669  | 7.638       |
| <b>1 1 1</b>               | 6.828                  | 6.843   | 6.853  | 6.850       |
| <b>1 -2 -1</b>             | 6.674                  | 6.701   | 6.677  | 6.678       |
| <b>0 3 1</b>               | 6.213                  | 6.224   | 6.217  | 6.203       |
| <b>1 3 0</b>               | 6.072                  | 6.071   | 6.085  | 6.056       |
| <b>1 2 1</b>               | 6.034                  | 6.043   | 6.053  | 6.043       |
| <b>0 0 2</b>               | 5.641                  | 5.683   | 5.639  | 5.674       |
| <b>0 4 0</b>               | 5.582                  | 5.578   | 5.588  | 5.556       |
| <b>1 -3 -1</b>             | 5.549                  | 5.563   | 5.552  | 5.543       |
| <b>0 1 2</b>               | 5.469                  | 5.507   | 5.467  | 5.497       |

<sup>a</sup> fitted based on crystal

**Table S3.** Summarized of crystal parameter **4**.

| <b>Compound</b>   | <b>simulated<sup>a</sup></b> | <b>crystal<sup>a</sup></b> | <b>Grind<sup>a</sup></b> |
|-------------------|------------------------------|----------------------------|--------------------------|
| Crystal system    | orthorhombic                 | orthorhombic               | orthorhombic             |
| <i>A</i> [Å]      | 12.9755                      | 9.6250                     | 13.0454                  |
| <i>B</i> [Å]      | 36.6305                      | 37.7916                    | 36.9103                  |
| <i>C</i> [Å]      | 12.4367                      | 13.0498                    | 12.6440                  |
| Crystallinity (%) | 98.86                        | 78.38                      | 96.95                    |
| <b>2θ</b> (°)     | 9.6435                       | 9.3767                     | 9.3907                   |
| FWHM (°)          | 0.0838                       | 0.0725                     | 0.2691                   |

<sup>a</sup> fitted based on crystal**Table S4** Summarized of XRD parameter **4**

| <b>simulated<sup>a</sup></b> |             | <b>crystal</b>   |             | <b>Grind</b>     |             |
|------------------------------|-------------|------------------|-------------|------------------|-------------|
| <b>2θ</b><br>(°)             | FWHM<br>(°) | <b>2θ</b><br>(°) | FWHM<br>(°) | <b>2θ</b><br>(°) | FWHM<br>(°) |
| 7.216                        | 0.092       | 4.668            | 0.048       | 4.621            | 1.206       |
| 9.644                        | 0.084       | 9.377            | 0.073       | 7.046            | 2.792       |
| 10.958                       | 0.083       | 12.170           | 0.051       | 9.391            | 0.269       |
| 12.217                       | 0.088       | 14.130           | 0.158       | 10.747           | 0.304       |
| 13.225                       | 0.001       | 18.842           | 0.834       | 13.562           | 0.223       |
| 13.822                       | 0.119       | 19.340           | 0.061       | 14.197           | 0.293       |
| 14.452                       | 0.088       | 22.428           | 0.135       | 15.351           | 0.345       |
| 15.023                       | 0.079       | 25.875           | 0.119       | 15.798           | 0.301       |
| 15.580                       | 0.078       | 28.989           | 0.238       | 16.991           | 0.419       |
| 15.973                       | 0.086       |                  |             | 18.961           | 0.066       |
| 16.129                       | 0.058       |                  |             | 19.563           | 0.378       |
| 17.013                       | 0.078       |                  |             | 21.633           | 0.255       |
| 17.379                       | 0.108       |                  |             | 22.147           | 20.000      |
| 18.225                       | 0.126       |                  |             | 24.831           | 0.322       |

---

|        |       |        |       |
|--------|-------|--------|-------|
| 19.356 | 0.080 | 25.827 | 0.190 |
| 19.748 | 0.079 | 41.784 | 0.088 |
| 19.936 | 0.086 |        |       |
| 20.356 | 0.058 |        |       |
| 20.649 | 0.079 |        |       |
| 21.189 | 0.050 |        |       |
| 21.856 | 0.072 |        |       |
| 22.262 | 0.067 |        |       |
| 22.614 | 0.080 |        |       |
| 22.908 | 0.083 |        |       |
| 23.252 | 0.050 |        |       |
| 23.964 | 0.087 |        |       |
| 24.560 | 0.084 |        |       |
| 25.072 | 0.096 |        |       |
| 25.173 | 0.063 |        |       |
| 25.561 | 0.113 |        |       |
| 26.102 | 0.077 |        |       |
| 26.900 | 0.125 |        |       |
| 27.622 | 0.092 |        |       |
| 27.861 | 0.143 |        |       |
| 28.250 | 0.088 |        |       |
| 28.685 | 0.101 |        |       |
| 28.816 | 0.064 |        |       |
| 29.183 | 0.558 |        |       |
| 29.598 | 0.070 |        |       |
| 30.218 | 0.050 |        |       |
| 30.413 | 0.050 |        |       |
| 31.131 | 0.116 |        |       |
| 31.933 | 0.120 |        |       |
| 33.300 | 0.226 |        |       |
| 35.192 | 0.165 |        |       |
| 35.600 | 0.137 |        |       |
| 35.860 | 0.081 |        |       |
| 36.887 | 0.283 |        |       |
| 37.591 | 0.259 |        |       |
| 38.884 | 0.050 |        |       |
| 40.143 | 0.087 |        |       |
| 40.833 | 0.158 |        |       |
| 41.068 | 0.092 |        |       |
| 41.714 | 0.097 |        |       |
| 42.108 | 0.119 |        |       |
| 42.597 | 0.050 |        |       |
| 42.888 | 0.050 |        |       |
| 43.122 | 0.070 |        |       |

---

---

|        |       |
|--------|-------|
| 43.538 | 0.089 |
| 43.556 | 0.005 |
| 44.207 | 0.099 |
| 44.908 | 0.136 |
| 45.857 | 0.649 |
| 47.454 | 0.118 |
| 47.643 | 0.093 |

<sup>a</sup> fitted based on crystal

---

## Cyclic Voltammetry

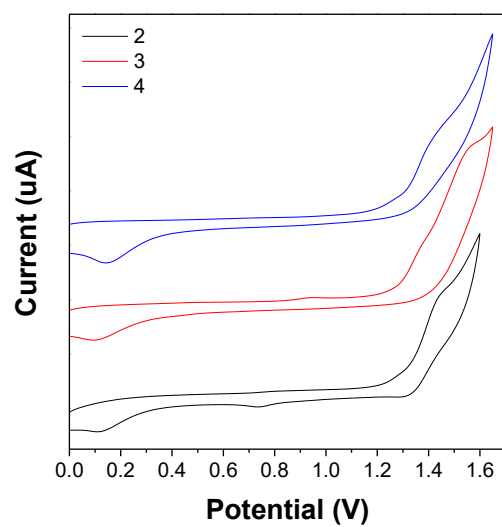

**Figure S28.** Cyclic voltammograms recorded for the compounds 2-4.

## DFT calculation

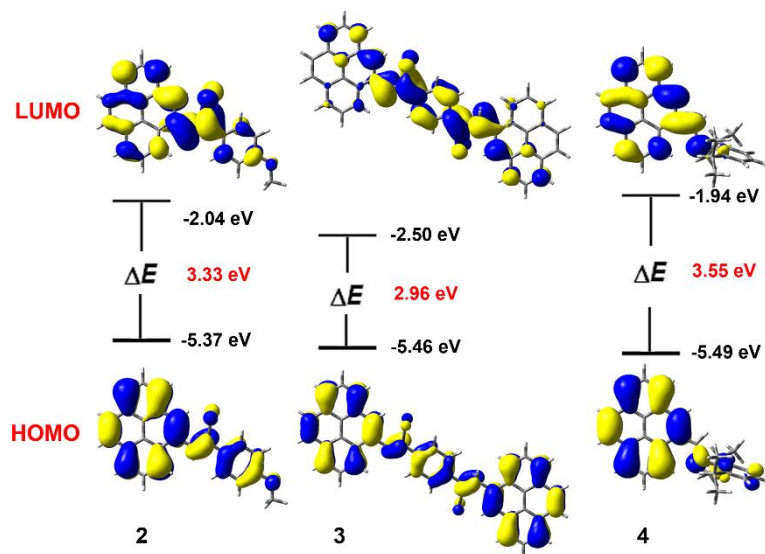

**Figure S29.** Computed molecular orbital plots (B3LYP/6-31G\*) of compounds of 2-4. The up plots represent the HOMOs, and the down plots represent the LUMOs.
